# Supplementary material for: Broadband terahertz recognizing conformational characteristics of a significant neurotransmitter γ-aminobutyric acid
Source: Royal Society of Chemistry journal article supplement (doi:10.1039/c9ra02971k), 2019-01-01
Supplement: c9ra02971k1.pdf [file c9ra02971k1.pdf]

Supplementary Information for

**Broadband Terahertz Recognizing Conformational Characteristics of a Significant Neurotransmitter  $\gamma$ -Aminobutyric Acid**

Chao Cheng,<sup>a,b,c</sup> Zhongjie Zhu,<sup>a,c</sup> Shaoping Li,<sup>b</sup> Guanhua Ren,<sup>a,c,d</sup> Jianbing Zhang,<sup>a,c</sup> Haixia Cong,<sup>c</sup> Yan Peng,<sup>e</sup> Jiaguang Han,<sup>d</sup> Chao Chang,<sup>\*,f</sup> Hongwei Zhao<sup>\*,a,c</sup>

<sup>a</sup>Zhangjiang Laboratory, Shanghai Advanced Research Institute, Chinese Academy of Sciences, Shanghai 201210, China

<sup>b</sup>School of Chemical Engineering, East China University of Science and Technology, Shanghai 200237, China

<sup>c</sup>Shanghai Institute of Applied Physics, Chinese Academy of Sciences, Shanghai 201800, China

<sup>d</sup>Center for Terahertz Waves and College of Precision Instrument and Optoelectronics Engineering, and Key Laboratory of Optoelectronics Information and Technology, Ministry of Education, Tianjin University, Tianjin 300072, China

<sup>e</sup>Shanghai Key Lab of Modern Optical System, University of Shanghai for Science and Technology No.516, Jungong Road, Shanghai 200093, China

<sup>f</sup>Advanced Interdisciplinary Technology Research Center, National Innovation Institute of Defense Technology, Beijing 100071, China

\*E-mail address: zhaohongwei@sinap.ac.cn

\*E-mail address: changc@xjtu.edu.cn

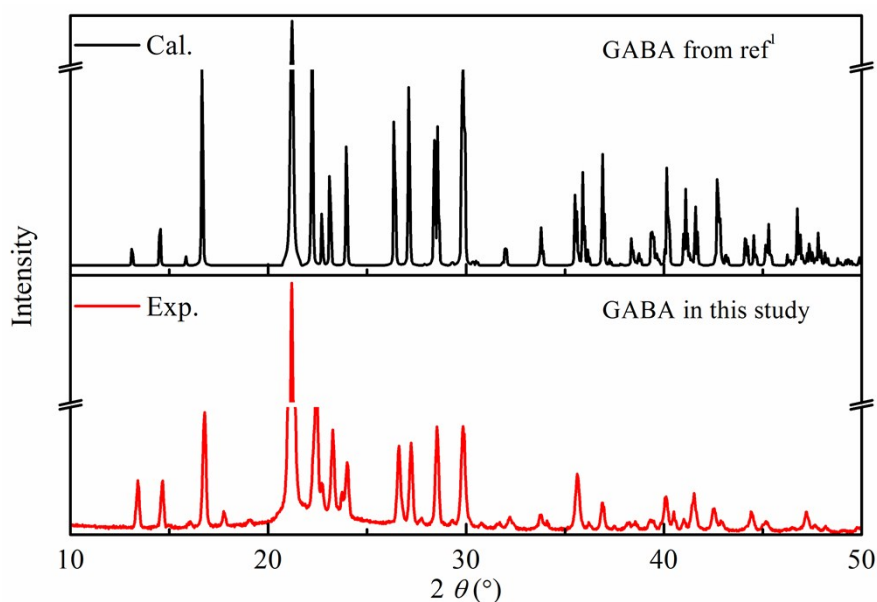

Figure S1. The calculated PXRD pattern of GABA and the corresponding experimental result.

As shown in Figure S1, PXRD was carried out to check the crystal structure of GABA. And the result manifests that the experimental PXRD pattern agrees very well with the calculated PXRD pattern of GABA.

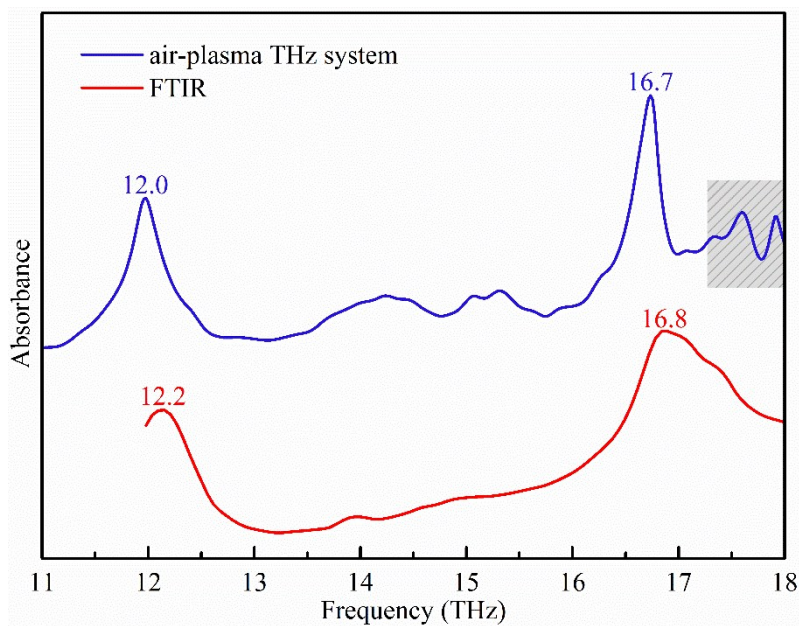

Figure S2. The comparison of the GABA spectra obtained by the broadband air-plasma THz system and FTIR.

Figure S2 shows the THz spectrum of GABA from 11 to 18 THz obtained by the broadband air-plasma THz system (COC as substrate) and the FTIR spectrum of GABA from 12 to 18 THz (KBr as substrate). We can see that the spectra from the broadband air-plasma THz system and FTIR in the 12-17 THz region covered by both systems are basically consistent.

### Supplementary Reference

1 H. P. Weber, B. M. Craven and R. K. McMullan, The Neutron Structure of and Thermal Motion in Gamma-Aminobutyric Acid (Gaba) at 122-K, *Acta Crystallographica Section B-Structural Science*, 1983, **39**, 360-366.
